# Supplementary material for: Time trend of malaria in relation to climate variability in Papua New Guinea
Source: PubMed Central journal article supplement — Environ Health Toxicol. 2016 Feb 25;31:e2016003. doi: 10.5620/eht.e2016003 (PMC4825189; doi:10.5620/eht.e2016003), 2016-02-25
Supplement: eht-31-e2016003-supple1.pdf [file eht-31-e2016003-supple1.pdf]

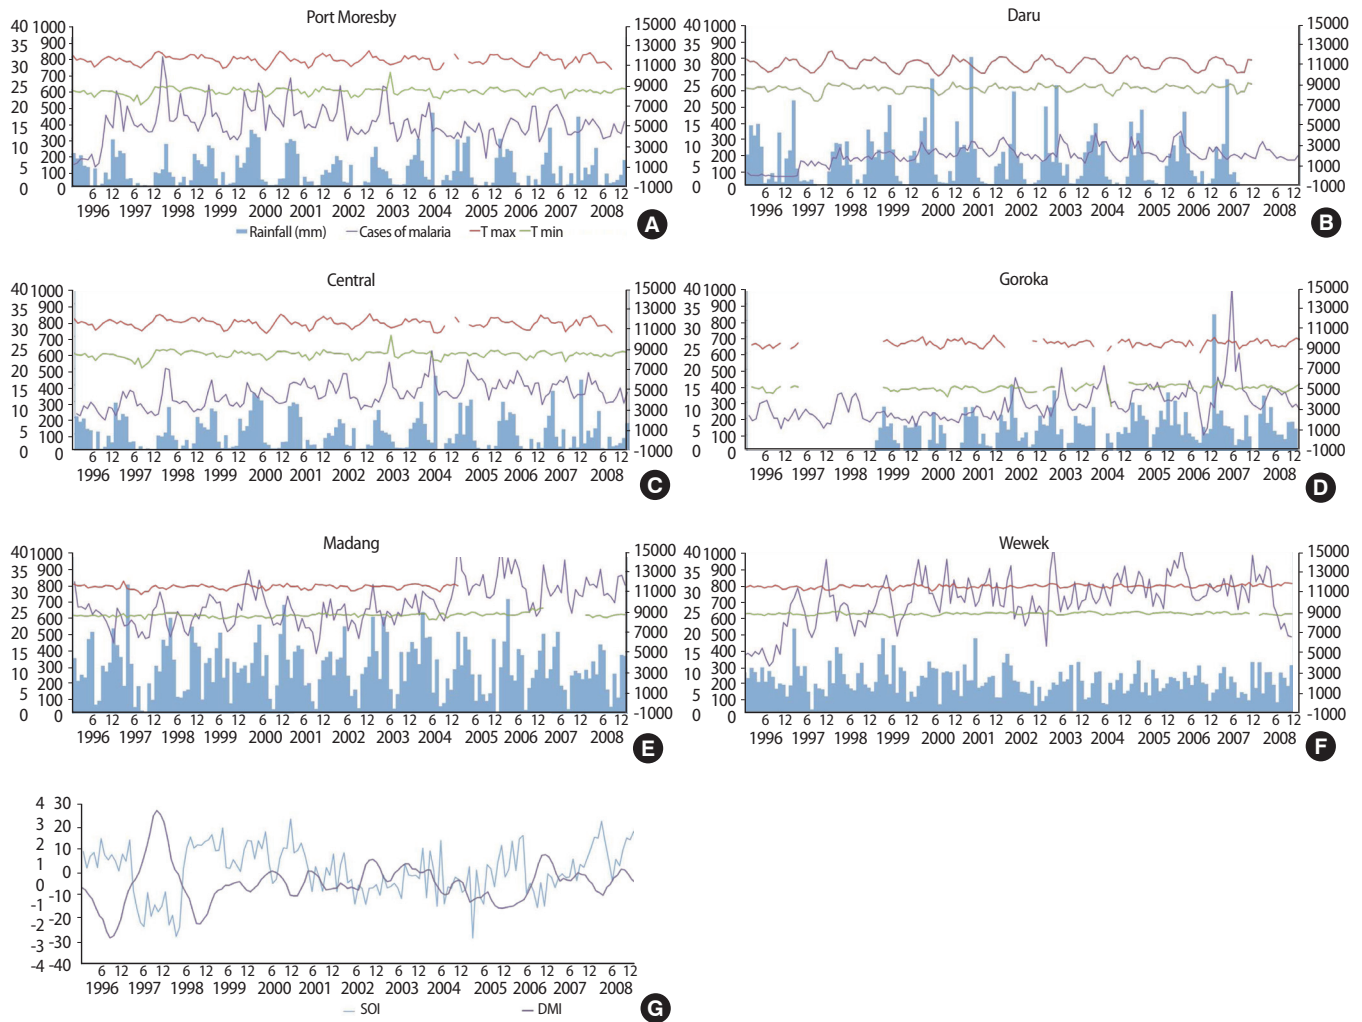

**Figure S1.** Time trend of monthly malaria cases and climate factors and oceanic surface temperature variations according to regions (A) Port Moresby, (B) Daru, (C) Central, (D) Goroka, (E) Madang, and (F) Wewak. Oceanic surface temperature were presented by southern oscillation index (SOI) and dipole mode index (DMI) in (G). T min, monthly average of daily minimum temperature; T max, monthly average of daily maximum temperature.
