# Supplementary material for: Time trend of malaria in relation to climate variability in Papua New Guinea
Source: PubMed Central journal article supplement — Environ Health Toxicol. 2016 Feb 25;31:e2016003. doi: 10.5620/eht.e2016003 (PMC4825189; doi:10.5620/eht.e2016003), 2016-02-25
Supplement: eht-31-e2016003-supple2.pdf [file eht-31-e2016003-supple2.pdf]

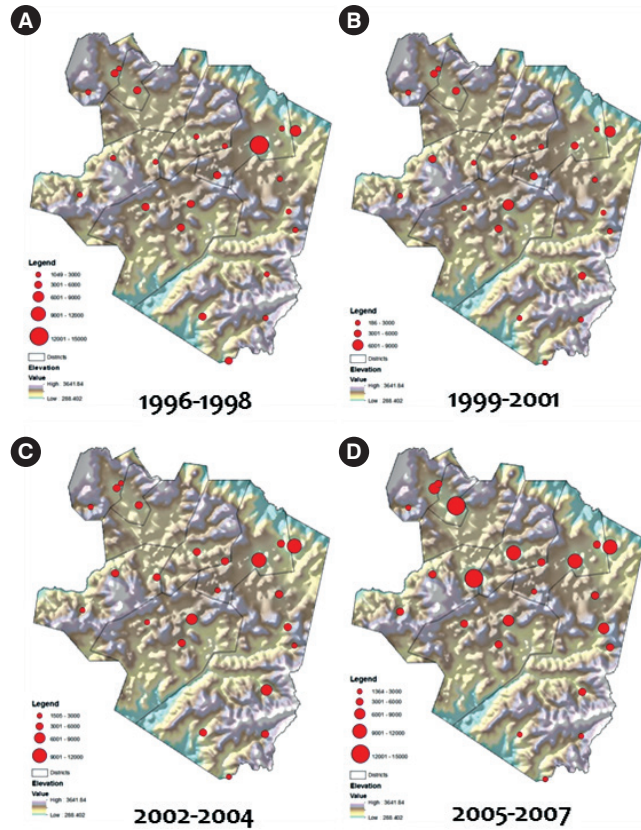

**Figure S2.** Malaria incidence of each health facility in the Eastern Highland Province of highland region during 1996-2007. In 3-year incidence, the number of health facilities at the altitude over 1600 m with more than 8000 patients was only one during 1996-1998 (A) and 1999-2001 (B), respectively, and increased to three during 2002-2004 (C) and up to four during 2005-2007 (D).
